# Supplementary material for: Ex Vivo 13C-Metabolic Flux Analysis of Porcine Circulating Immune Cells Reveals Cell Type-Specific Metabolic Patterns and Sex Differences in the Pentose Phosphate Pathway
Source: MDPI journal article supplement (doi:10.3390/biom14010098), 2024-01-12
Supplement: s1 [file s1]

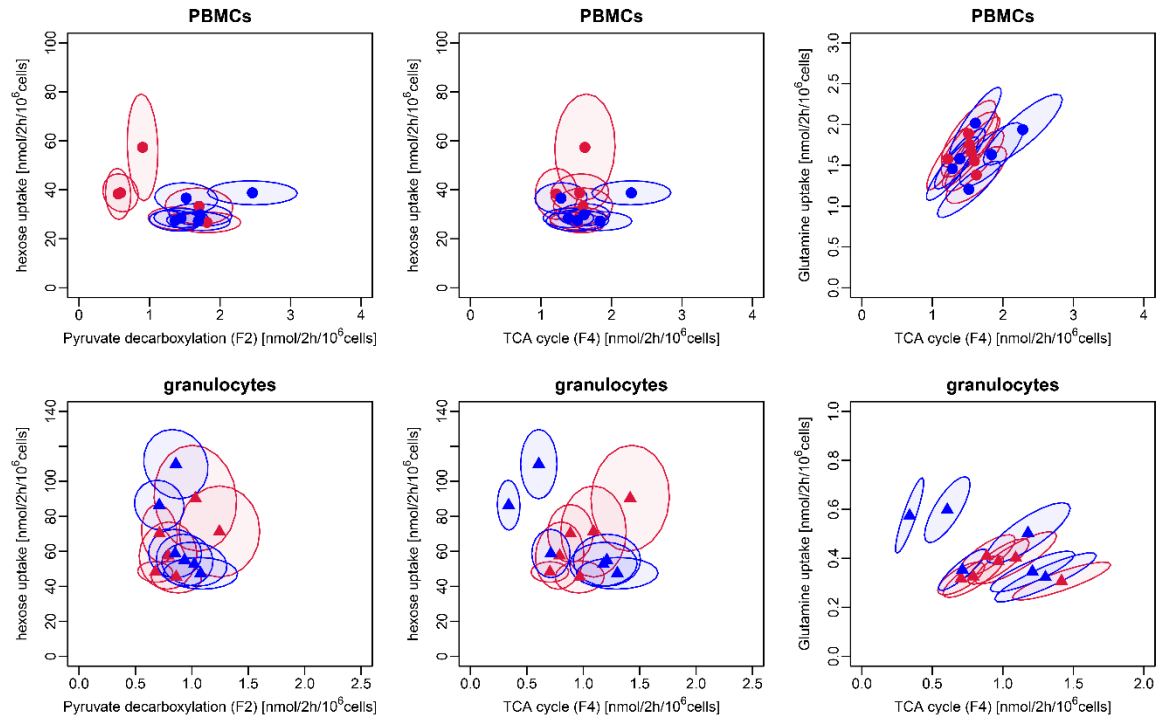

**Figure S1.** Flux relations in PBMCs and granulocytes: Left/middle: Relations between hexose (glucose/fructose) uptake rate and F2 (Pyruvate  $\rightarrow$  AcCoA + CO<sub>2</sub>), and hexose (glucose/fructose) uptake and F4 (Oac + AcCoA  $\rightarrow$  Cit  $\rightarrow$  Akg + CO<sub>2</sub>), respectively. Right: Correlation between glutamine uptake into the TCA cycle and TCA cycle flux F4 (Oac + AcCoA  $\rightarrow$  Cit  $\rightarrow$  Akg + CO<sub>2</sub>). Bayesian <sup>13</sup>C-MFA results are displayed as an ellipse with 68% confidence interval ( $\pm$  one standard deviation of the mean) of posterior distributions with posterior mean indicated by symbols (PBMCs: circles, granulocytes: triangles). Data from female pigs are highlighted in red and males in blue.
