# Supplementary material for: Ex Vivo 13C-Metabolic Flux Analysis of Porcine Circulating Immune Cells Reveals Cell Type-Specific Metabolic Patterns and Sex Differences in the Pentose Phosphate Pathway
Source: Biomolecules. 2024 Jan 12;14(1):98. doi: 10.3390/biom14010098 (PMC10813356; doi:10.3390/biom14010098)
Supplement: Supplementary file 1 [file biomolecules-14-00098-s001.zip › Supplementary material.xlsx]

## Sheet: RPMI
Modified RPMI 1640
	Component
		mg/L
Inorganic salts	CaNO3 x 4 H2O	100.00
	KCl	400.00
	MgSO4 (free of water)	48.84		corresponds to 100.00 mg/L MgSO4 x 7H2O
	NaCl *	6000.00
	Na2HPO4 (free of water)	800.49
	NaHCO3	100
Other components	Glutathione (red.)	1.00
	Phenol red	5.00
Amino acids	L-Arginine x HCl	241.86		corresponds to 200.00 mg/L L-Arginine
	L-Asparagine x H2O	50.00
	L-Aspartic acid	20.00
	L-Cystine	50.00		corresponds to 50.00 mg/L L-Cysteine
	L-Glutamic acid	20.00
	Glycine	10.00
	L-Histidine base	15.00		corresponds to 15.00 mg/L L-Histidine base
	L-Hydroxyproline	20.00
	L-Isoleucine	50.00
	L-Leucine	50.00
	L-Lysine x HCl	40.00
	L-Methionine	15.00
	L-Phenylalanine	15.00
	L-Proline	20.00
	L-Serine	30.00
	L-Threonine	20.00
	L-Tryptophan	5.00
	L-Tyrosine	20.00		corresponds to 28.83 mg/L L-Tyrosine x 2Na x 2H2O
	L-Valine	20.00
Vitamines	p-Aminobenzoic acid	1.00
	D(+)-Biotin	0.20
	D-Ca-pantothenate	0.25
	Choline chloride	3.00
	Folic acid	1.00
	myo-Inositol	35.00
	Nicotinamide	1.00
	Pyridoxol x HCl	1.00
	Riboflavin	0.20
	Thiamine x HCl	1.00
	Vitamine B12	0.005
	HEPES	4766		HEPES ( (4-(2-hydroxyethyl)-1-piperazineethanesulfonic acid) )
Supplements for 13C-tracer experiment:
Phagocytosis-RPMI	Glucose	1800
	Glutamine	600
[1.2-13C]glucose tracer	Glutamine	600
	Glucose	900
	[1.2-13C]glucose	900
[4.5,6-13C]glucose tracer	Glutamine	600
	Glucose	900
	[4.5,6-13C]glucose	900
[U-13C]glucose tracer	Glutamine	600
	Glucose	900
	[U-13C]glucose	900
[U-13C]glutamine tracer	[U-13C]glutamine	600
	Glucose	1800

## Sheet: antibodies FACS+Buffer
Description	Specificity	Isotype	Product Type	REF/no.	Manufacturer
MOUSE ANTI PIG CD3	CD3 EPSILON	IgG1	Monoclonal Antibody	MCA5951GA	Bio-Rad Laboratories, Hercules, CA, USA
MOUSE IgG2b NEGATIVE CONTROL:FITC	MOUSE IgG2b NEGATIVE CONTROL	IgG2b	IgG2b	MCA691F
MOUSE IgG1 NEGATIVE CONTROL:FITC	MOUSE IgG1 NEGATIVE CONTROL	IgG1	Negative/Isotype Control	MCA928F
MOUSE ANTI PIG CD8 ALPHA	CD8 ALPHA	IgG2a	Monoclonal Antibody	MCA6048PE
MOUSE IgG2a NEGATIVE CONTROL:RPE	MOUSE IgG2a NEGATIVE CONTROL	IgG2a	Negative/Isotype Control	MCA929PE
MOUSE ANTI PIG CD4 ALPHA	CD4 ALPHA	IgG2b	Monoclonal Antibody	MCA1749F
IgG1 Antibody, anti-mouse, APC	mouse IgG1	rat IgG1	Secondary antibodies	130-120-494	Miltenyi Biotech, Bergisch-Gladbach, Germany
Fluorescence-activated cell sorting (FACS) buffer	Component			Manufacture
	Bovine Serum Albumin		10 g	Sigma-Aldrich, St. Louis, MO, USA
	DPBS (1X) Dulbecco's Phosphate Buffer Saline		500 mL	Gibco-Invitrogen, Paisley, Scotland, UK
	0.5 M EDTA, pH = 8		2 mL	Gibco-Invitrogen, Paisley, Scotland, UK
	HEPES Buffer solution 1M		12.5 mL	Gibco-Invitrogen, Paisley, Scotland, UK

## Sheet: GC-MS settings
GC-MS Parameter: Analysis intracellular metabolites
Parameter	Description
Injection source	7693 Autosampler (Agilent, Waldbronn, Germany)
Gas chromatograph	7890A (Agilent, Waldbronn, Germany)
Mass spectrometer	5977B Mass Selective Detector (Agilent, Waldbronn, Germany)
Column	OPTIMA 1301-MS (Macherey-Nagel, Dürren, Germany)
Column diameter	Length 30m, Inner Diameter 0.25 mm, Film Thickness 0.25 µm
Carrier gas	Helium (5.0)
Carrier flow	1.0 mL/min (constant flow)
Injection volume	1 µL
Injection temperature	250°C
Inlet mode	Pulsed Splitless or Split
Injection pulse pressure	30 psi Until 0.75 min
Purge flow to split vent	50 mL/min at 0.9 min
MS transferline temperature	300°C
Ion source temperature	250 °C
Quadrupole temperature	150 °C
MS ionisation	Electron Ionisation (70 eV)
MS acquisition mode	SIM (Selected Ion Monitoring) (monitored m/z are available in the sheet "SIM-parameter")
GC temperature program
	Rate [°C/min]	Temperature [°C]	Hold Time [min]	Run Time [min]
(Initial)		70	1	1
Ramp 1	30	140	0	3.33333
Ramp 2	20	210	0	6.83333
Ramp 3	10	273	0	13.1333
Ramp 4	50	300	2	15.6733
GC-MS Parameter: Analysis of lactate
Parameter	Description
Injection source	HP 6890 Autosampler (Hewlett-Packard/Agilent, Waldbronn, Germany)
Gas chromatograph	HP 6890 GC Sytem (Hewlett-Packard/Agilent, Waldbronn, Germany)
Mass spectrometer	5973 Mass Selective Detector (Hewlett-Packard/Agilent, Waldbronn, Germany)
Column	OPTIMA 5-MS (Macherey-Nagel, Dürren, Germany)
Column diameter	Length 12m, Inner Diameter 0.20 mm, Film Thickness 0.35 µm
Carrier gas	Helium (5.0)
Mode	5 psi (constant pressure)
Injection volume	1 µL
Injection temperature	200°C
Inlet mode	Pulsed Splitless
Injection pulse pressure	10 psi until 1 min
Purge flow to split vent	30 mL/min at 0.95 min
MS transferline temperature	300°C
Ion source temperature	230 °C
Quadrupole temperature	150 °C
MS ionisation	Electron Ionisation (70 eV)
MS acquisition mode	SIM (Selected Ion Monitoring)
m/z (dwell [msec])	261.1 (7); 262.1 (7); 263.1 (7); 264.1 (7); 265.1 (7); 266.1 (7)
GC temperature program
	Rate [°C/min]	Temperature [°C]	Hold Time [min]	Run Time [min]
(Initial)		80	1	1
Ramp 1	20	180	0	6
Ramp 2	50	300	2	10.4
GC-MS Parameter: Analysis of CO2
Parameter	Description
Injection source	7693 Autosampler (Agilent, Waldbronn, Germany)
Gas chromatograph	7890B (Agilent, Waldbronn, Germany)
Mass spectrometer	5975C Mass Selective Detector (Agilent, Waldbronn, Germany)
Column	OPTIMA 5-MS (Macherey-Nagel, Dürren, Germany)
Column diameter	Length 30m, Inner Diameter 0.25 mm, Film Thickness 0.25 µm
Carrier gas	Helium (5.0)
Carrier flow	1.0 mL/min (constant flow)
Injection volume	5 µL
Injection temperature	250°C
Inlet mode	Split
Split ratio	20:01:00
Split flow	16.199 mL/min
Injection type	Multiple Injections
Injection repetitions	10
Injection delay	15 sec
MS transferline temperature	300°C
Ion source temperature	250 °C
Quadrupole temperature	150 °C
MS ionisation	Electron Ionisation (70 eV)
MS acquisition mode	SIM (Selected Ion Monitoring)
m/z (dwell [msec])	44 (40); 45 (40)
GC temperature program
	Rate [°C/min]	Temperature [°C]	Hold Time [min]	Run Time [min]
	-	100	5	5

## Sheet: SIM-parameter
SIM Parameter: Analysis intracellular metabolites
Method 1
Group	Lactate	Fumarate	Aspartate	Glutamine	Glutamate	G1P	G3P	DHAP	Glucose	Glucose	P5P	F6P	M6P/G6P	S7P
Fragment	C1-C3	C1-C4	C1-C4	C1-C5	C1-C5	C1-C6	C1-C3	C1-C3	C1-C6	C3-C6	C1-C5	C4-C6	C1-C6	C4-C7
Group Start Time [min]	4	5.74	6.8	7.04	7.38	8.1	8.41	8.65	9.2	9.56	10.5	12.1	12.68	13.7
m/z	218.1	244.1	348.1	272.1	362.2	449.2	444.1	413.1	567.3	318.2	459.2	458.2	471.2	470.2
	219.1	245.1	349.1	273.1	363.2	450.2	445.1	414.1	568.3	319.2	617.2	459.2	719.3	471.2
	220.1	246.1	350.1	274.1	364.2	451.2	446.1	415.1	569.3	320.2	618.2	460.2	720.3	472.2
	221.1	247.1	351.1	275.1	365.2	452.2	447.1	416.1	570.3	321.2	619.2	461.2	721.3	473.2
	222.1	248.1	352.1	276.1	366.2	453.2	448.1	417.1	571.3	322.2	620.2	462.2	722.3	474.2
	223.1	249.1	353.1	277.1	367.2	454.2	449.1	418.1	572.3	323.2	621.2	463.2	723.3	475.2
		250.1	354.1	278.1	368.2	455.2			573.3	324.2	622.2		724.3	476.2
			355.1	279.1	369.2	456.2			574.3		623.2		725.3
			356.1	280.1	370.2	457.2			575.3		624.2		726.3
				281.1									727.3
Method 2
Group	Lactate	Serine	Aspartate	Glutamine	Glutamate	G1P	G3P	Citrate	3PG	Glucose	R5P	M6P/G6P
Fragment	C1-C3	C1-C3	C1-C4	C2-C5	C1-C5	C1-C6	C1-C3	C1-C6	C1-C3	C3-C6	C3-C5	C4-C6
Group Start Time [min]	4	5.76	6.8	7.04	7.38	8.1	8.41	8.66	8.81	9.2	10.5	12.1
m/z	218.1	277.1	348.1	229.1	347.1	449.2	444.1	374.1	458.1	318.2	458.2	471.2
	219.1	278.1	349.1	230.1	348.1	450.2	445.1	375.1	459.1	319.2	459.2	472.2
	220.1	279.1	350.1	231.1	349.1	451.2	446.1	376.1	460.1	320.2	460.2	473.2
	221.1	280.1	351.1	232.1	350.1	452.2	447.1	377.1	461.1	321.2	461.2	474.2
	222.1	281.1	352.1	233.1	351.1	453.2	448.1	378.1	462.1	322.2	462.2	475.2
	223.1	282.1	353.1	234.1	352.1	454.2	449.1	379.1	463.1	323.2	463.2	476.2
		283.1	354.1	235.1	353.1	455.2		380.1		324.2
			355.1	236.1	354.1	456.2		381.1
			356.1	237.1	355.1	457.2		382.1
				238.1
Method 3
Group	Lactate	Serine	Aspartate	Glutamine	Glutamate	G1P	G3P	Citrate	3PG	Glucose	P5P/H6P
Fragment	C1-C3	C1-C3	C2-C4	C1-C5	C2-C5	C1-C6	C2-C3	C1-C5	C1-C3	C1-C6	C4-C5/C5-C6
Group Start Time [min]	4	5.76	6.8	7.04	7.38	8.1	8.41	8.66	8.81	9.2	10.5
m/z	218.1	305.1	231.1	257.1	245.1	449.2	356.1	272.1	458.1	567.3	356.1
	219.1	306.1	232.1	258.1	246.1	450.2	357.1	273.1	459.1	568.3	357.1
	220.1	307.1	233.1	259.1	247.1	451.2	358.1	274.1	460.1	569.3	358.1
	221.1	308.1	234.1	260.1	248.1	452.2	359.1	275.1	461.1	570.3	359.1
	222.1	309.1	235.1	261.1	249.1	453.2	360.1	276.1	462.1	571.3	360.1
	223.1	310.1	236.1	262.1	250.1	454.2		277.1	463.1	572.3
			237.1	263.1	251.1	455.2		278.1		573.3
			238.1	264.1	252.1	456.2		279.1		574.3
			239.1	265.1	253.1	457.2		280.1		575.3
				266.1

## Sheet: Fragments 13C-MFA
Fragments for 13C-MFA
metabolite (fragment)
3PG (C1-C3)
Aspartate (C1-C4)
Aspartate (C2-C4)
Citrate (C1-C5)
Citrate (C1-C6)
DHAP (C1-C3)
Fumarate (C1-C4)
G6P (C1-C6)
G6P (C3-C6)
G6P (C5-C6)
Glutamate (C1-C5)
Glutamate (C2-C5)
Glutamine (C1-C5)
Lactate (C1-C3)
P5P (C1-C5)
P5P (C3-C5)
13CO2 production
Lactate production
